# Supplementary material for: Identification of cell context-dependent YAP-associated proteins reveals β1 and β4 integrin mediate YAP translocation independently of cell spreading
Source: PubMed Central journal article supplement (PMC6868278; doi:10.1038/s41598-019-53659-4), 2019-11-20

Supplementary Information

**Identification of cell context-dependent YAP-associated proteins reveals  $\beta_1$  and  $\beta_4$  integrin mediate YAP translocation independently of cell spreading**

Joanna Y. Lee<sup>1+</sup>, Antonia A. Dominguez<sup>2-4</sup>, Sungmin Nam<sup>1</sup>, Ryan S. Stowers<sup>1</sup>, Lei S. Qi<sup>2-4</sup>, and  
Ovijit Chaudhuri<sup>1\*</sup>

**Affiliations:**

<sup>1</sup>Department of Mechanical Engineering, Stanford University, Stanford, CA 94305

<sup>2</sup>Department of Bioengineering, Stanford University, Stanford, CA 94305.

<sup>3</sup>Department of Chemical and Systems Biology, Stanford University, Stanford, CA 94305.

<sup>4</sup>Stanford ChEM-H, Stanford University, Stanford, CA 94305.

<sup>+</sup>Current affiliation: Department of Biochemical and Cellular Pharmacology, Genentech, South San Francisco, CA 94080

\*Correspondence to: [chaudhuri@stanford.edu](mailto:chaudhuri@stanford.edu)

**Includes:**

Supplementary Figures 1–3

Supplementary Figures

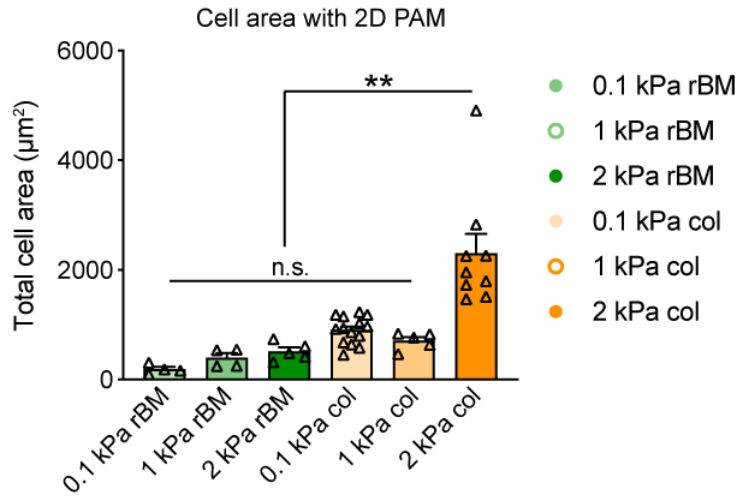

**Supplementary Figure 1. Cell area with 2D PAM conditions.** Total cell area (i.e. nuclear + cytoplasmic) on 2D substrates,  $**p < 0.0001$ . Bars represent mean  $\pm$  SEM, symbols represent each cell, p-values from one-way ANOVA followed by Tukey post-hoc comparison tests.

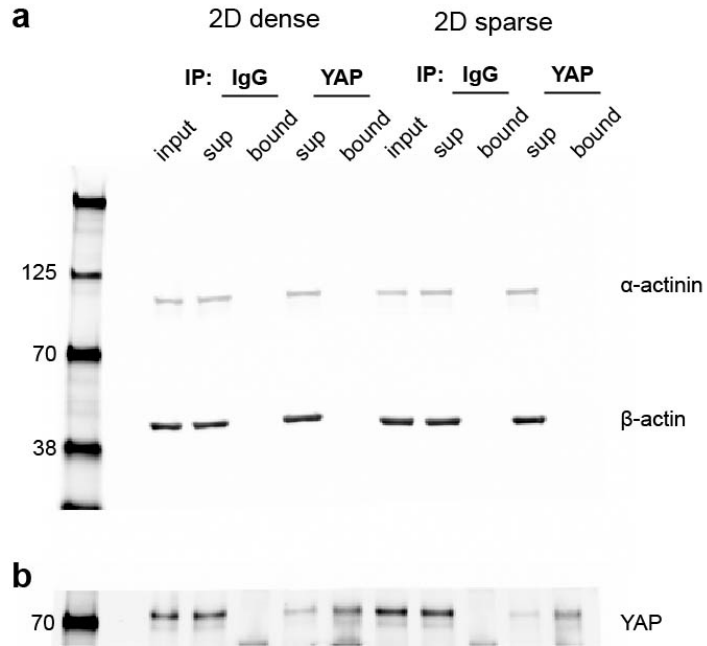

**Supplementary Figure 2. Uncropped Western blots from co-IP. (a)**  $\alpha$ -actinin and  $\beta$ -actin blots. **(b)** Blot from (a) stripped and re-probed for YAP.

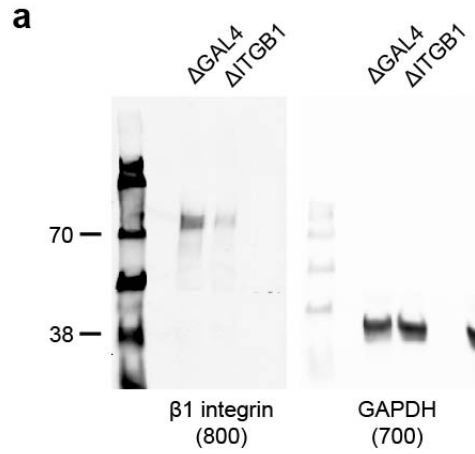

**Supplementary Figure 3.**  
**Uncropped Western blots from**  
**KOs. (a)** Lower exposure  $\beta$ <sub>1</sub> integrin  
and GAPDH blots. **(b)** Higher  
exposure  $\beta$ <sub>4</sub> integrin and GAPDH  
blots.

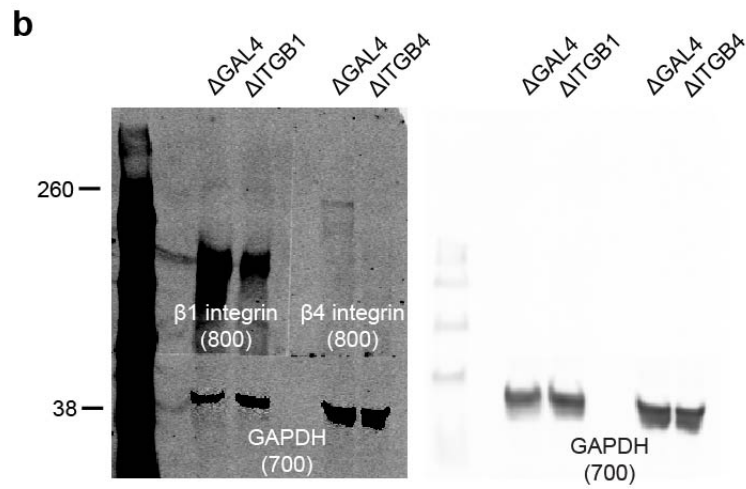

Supplement: 41598_2019_53659_MOESM1_ESM.pdf [file 41598_2019_53659_MOESM1_ESM.pdf]
